# Supplementary material
Source: publisher figshare collection journal article supplement (https://frontiersin.figshare.com/ndownloader/files/26032991)
Supplement: Supplementary file 1 [file 26032991]

Managed

Feral

n=17

n=8

n=8

n=17

n=17

n=8

n=8

n=17

**Supplementary Figure 1**. Prevalence of pathogens in feral and managed colonies. Deformed wing virus (DWV) and Black queen cell virus (BQCV) were detected in all colonies at all times of sampling. Presence of *Nosema ceranae* was tested for in colonies sampled in 2018, but not in 2017. *Nosema ceranae* was found in 47.1% and 76.47% of feral colonies in spring and fall, respectively, while 64.7% and 58.8% of managed colonies tested positive for *N. ceranae* in spring and fall, respectively.
